# Supplementary material for: The formation and mechanism of nano-monocrystalline γ-Fe2O3 with graphene-shell for high-performance lithium ion batteries
Source: Royal Society of Chemistry journal article supplement (doi:10.1039/c6ra08143f), 2016-01-01
Supplement: c6ra08143f1.pdf [file c6ra08143f1.pdf]

**Electronic Supplementary Information for**  
**Formation and its mechanism of nano-monocrystalline  $\gamma$ -Fe<sub>2</sub>O<sub>3</sub> with graphene-shell for**  
**high-performance lithium ion battery**

Jiangtao Hu<sup>‡</sup>, Wen Li<sup>‡</sup>, Chaokun Liu, Hanting Tang, Hua Guo, Tongchao Liu, Xiaohe Song,  
Jiixin Zheng, Yidong Liu, Yandong Duan\* and Feng Pan\*

School of Advanced Materials, Peking University Shenzhen Graduate School, Peking  
University, Shenzhen 518055, China

\* Corresponding author: [panfeng@pkusz.edu.cn](mailto:panfeng@pkusz.edu.cn)

‡ Jiangtao Hu and Wen Li contributed equally to this work.

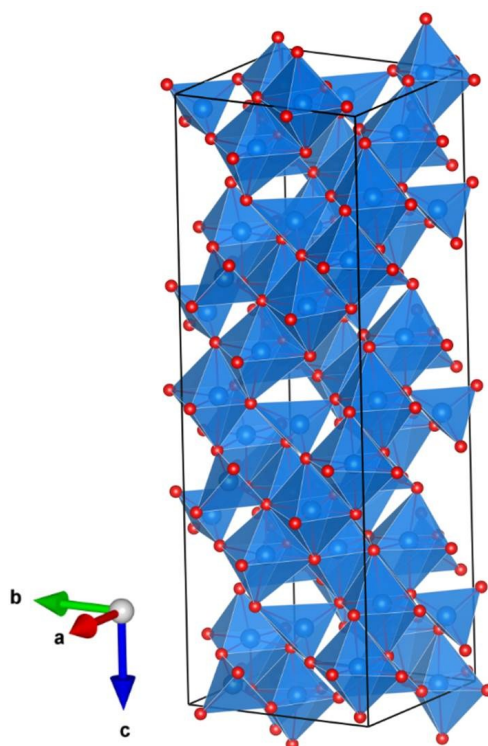

**Figure S1.** The crystal structure of  $\gamma$ -Fe<sub>2</sub>O<sub>3</sub>.

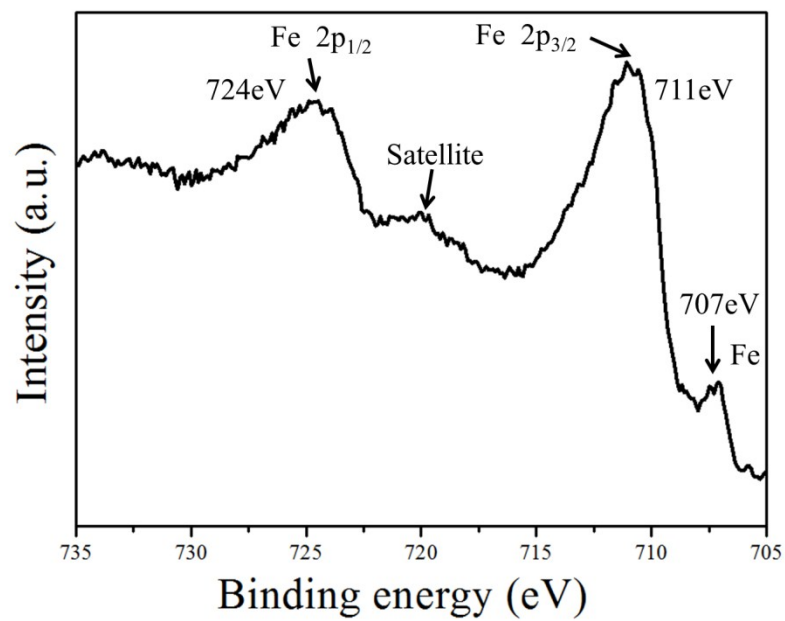

**Figure S2.** The X-ray photoelectron spectroscopy (XPS) spectra (Fe2p spectra) of monocrystal  $\gamma$ -Fe<sub>2</sub>O<sub>3</sub>@Graphene.

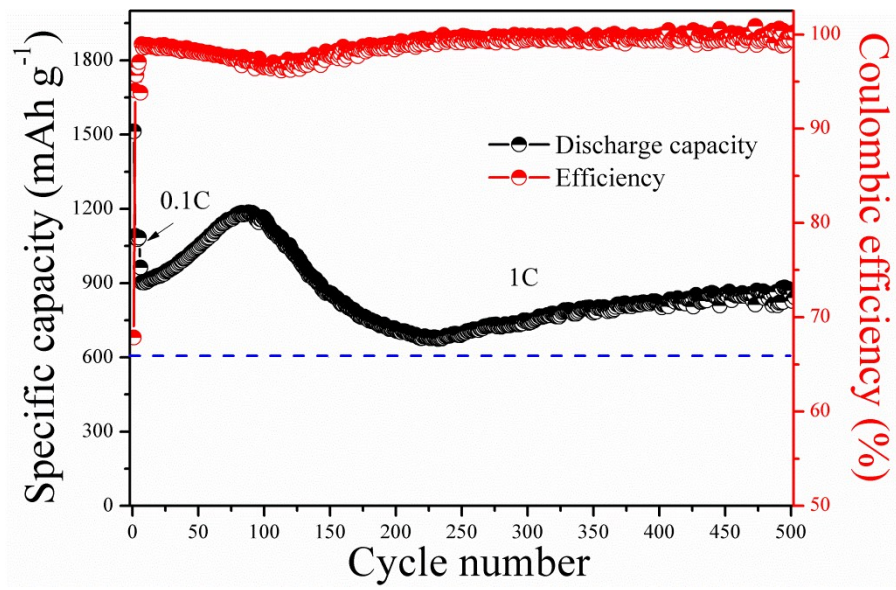

**Figure S3.** The cycle stability and coulombic efficiency of monocrystalline  $\gamma$ - $\text{Fe}_2\text{O}_3$ @Graphene at 1C.

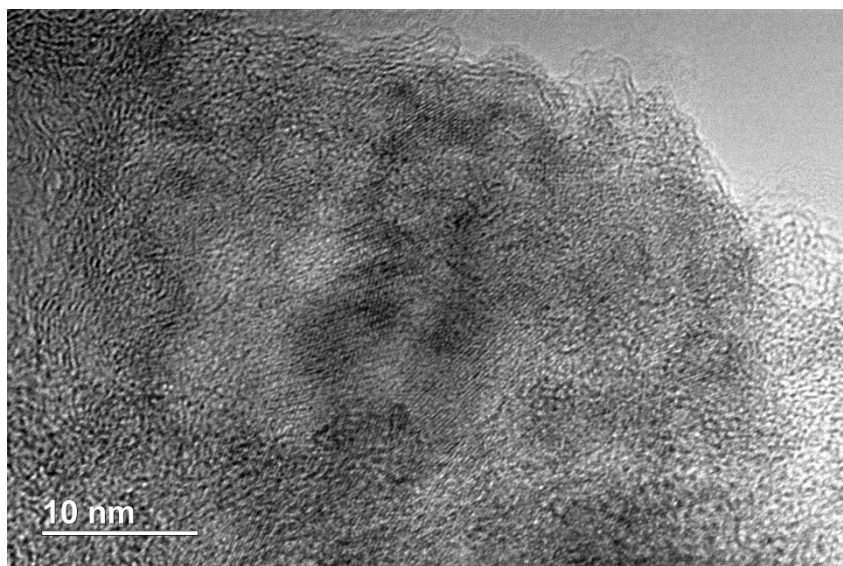

**Figure S4.** The TEM data of monocrystal  $\gamma\text{-Fe}_2\text{O}_3$ @Graphene after 100 cycles.

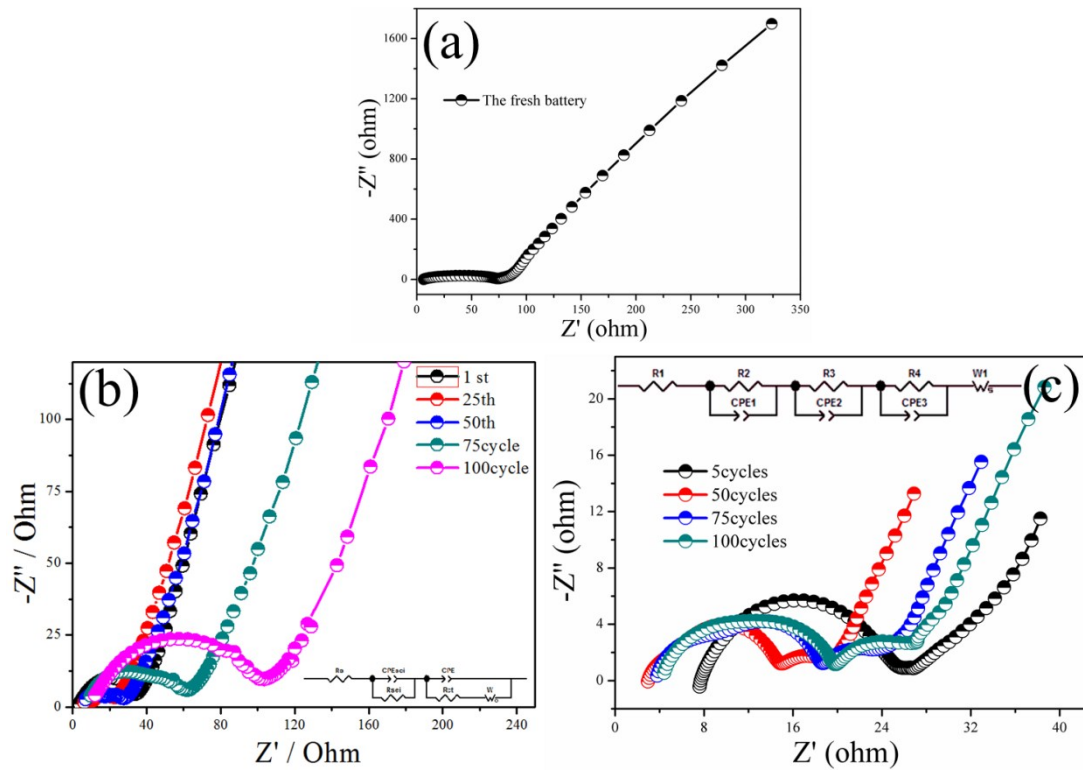

**Figure S5.** (a) EIS data of monocrystal  $\gamma\text{-Fe}_2\text{O}_3@\text{Graphene}$  with the fresh battery; (b and c) EIS data and equivalent circuit of our previous work (Core-Shell Nanohollow- $\gamma\text{-Fe}_2\text{O}_3@\text{Graphene}$ ) and monocrystal  $\gamma\text{-Fe}_2\text{O}_3@\text{Graphene}$  after different cycle numbers.
